# Supplementary material
Source: publisher figshare collection journal article supplement (https://gsapubs.figshare.com/ndownloader/files/22745897)

Spooner, N.A., Questiaux, D.G. and JW Magee

### Optical dating

The light-sensitive nature of quartz optically-stimulated luminescence (OSL) (Spooner 1994) makes quartz a valued environmental dosimeter for the optical dating of unburnt sediment, where the resetting mechanism was exposure to sunlight. Age evaluation by the optical dating technique requires both measurement and calibration of the OSL that has accrued since the last exposure to light, termed the palaeodose, (P), and also of the environmental dose-rate; these are further discussed by Aitken (1998).

### Sample collection and preparation and palaeodose (P) measurement

Sediment samples were collected using steel coring tubes driven into freshly-exposed section faces, and each core tube contained sufficient sediment for *in-situ* water content measurement and for laboratory assay of the soil radioisotope (U, Th and K) concentrations.

In the laboratory, quartz grains of 90-125  $\mu\text{m}$  were extracted from each sediment sample under low-intensity red and orange light (Spooner et al. 2000) in a procedure involving sequential HCl acid digestion, dry sieving, heavy liquid flotation (collecting  $< 2.68 \text{ g cm}^{-3}$  fraction), and then etching in 48 % HF acid for 40 minutes to remove the outer 6-8  $\mu\text{m}$  alpha-particle irradiated shell. OSL measurements were performed on approximately 5-6 mg of etched quartz attached by silicone oil to the central 7 mm diameter of each of 128 stainless steel discs.

OSL measurements were made using an Elsec Type 9010 automated reader with 500  $\pm$  80 nm stimulation, and UV emissions detected by an EMI 9235QA photomultiplier tube optically filtered by one UG 11 and one U-340 filter and P determined by the "Australian slide" (Prescott et al., 1993) using a linear plus single saturating exponential fit (scale factor = 1.00). Two representative Australian Slide growth curves are shown in Figs 1 and 2. Further details may be found in Spooner et al. (2001).

### Dose-rate determination

The U, Th and K concentrations in the bulk sediment were measured by neutron activation analysis and delayed neutron activation (NAA/DNA) (Becquerel Laboratories, Lucas Heights Science and Technology Centre), and K was calculated from measurements of  $\text{K}_2\text{O}$  by x-ray fluorescence (XRF) (Dept. Geology, ANU). Radioisotope activities for U, Th and K were also measured by high-resolution gamma spectrometry (CSIRO Division of Land and Water, Canberra, Australia) and subsequently converted to concentrations; these data confirmed secular equilibrium in the U and Th decay chains. As *in situ* gamma-ray scintillometry was unavailable, the samples were collected greater than 30 cm from unit boundaries hence it is assumed that laboratory radioisotope assays are valid for gamma dose-rate calculation. The best estimates of the bulk sediment concentrations of U, Th and K were calculated by weighted means of the measured values.

Cosmic ray dose-rates were calculated using the data of Prescott and Hutton (1994), making allowance for site altitude, geomagnetic latitude and time-averaged thickness of sediment overburden (estimated by JWM). Alpha-particle irradiation from radioisotopes within the etched quartz grains was assumed to be 10% of the external

activity (Aitken, 1998), and the efficiency with which alpha-particle irradiation induced OSL was assumed to be  $a = 0.05 \pm 0.02$ , following Questiaux (1990) and Thorne et al. (1999).

Long-term water content was estimated from measured values and reconstructions of the landscape history and topographic position by JWM with adopted uncertainties sufficient to accommodate all likely possibilities. Table 1 presents the palaeodose measurements, the dose-rates, water content estimates and ages calculated using the AGE program of Grün (1999), incorporating the dose-rate conversion factors of Adamiec and Aitken (1998).

### **Table Caption**

**Table 1.** OSL ages for each sample, along with the measured palaeodose, calculated dose-rates and estimated water contents.

### **Figure Captions:**

**Fig 1.** Australian Slide growth curve for sample WmPt7

**Fig 2.** Australian Slide growth curve for sample Syd Harb 2

### **References**

Adamiec, G., and Aitken, M.J., 1998, Dose-rate conversion factors: update: *Ancient TL*, v. 16(2), p. 37-50.

Aitken, M.J., 1998, *An introduction to optical dating*: Oxford University Press

Grün, R., 1999, Age calculation. Unpublished computer program, Australian National University, Australia.

Prescott, J.R., and Hutton, J.T., 1994, Cosmic ray contributions to dose-rates for luminescence and ESR dating: large depths and long-term time variations: *Radiation Measurements*, v. 23(2/3), p. 497-500.

Prescott, J.R., Huntley, D.J., and Hutton, J.T., 1993, Estimation of equivalent dose in thermoluminescence dating – the *Australian slide* method: *Ancient TL*, v. 11(1) p. 1-5.

Questiaux, D.G., 1990, Optical dating of loess: comparisons between different grain size fractions for infrared and green excitation wavelengths: *Nuclear Tracks and Radiation Measurements*, v. 18(1/2) p. 133-139.

Spooner, N.A., 1994, On the optical dating signal from quartz: *Radiation Measurements*, v. 23(2/3), p. 593-600.

Spooner, N.A., Olley, J.M., Questiaux, D.G., and Chen, X.Y., 2001, Optical dating of an aeolian deposit on the Murrumbidgee floodplains: Quaternary Science Reviews (Quaternary Geochronology), v. 20, p. 835-840.

Spooner, N.A., Questiaux, D.G., and Aitken, M.J., 2000, The use of sodium lamps for low- intensity laboratory safelighting for optical dating: Ancient TL, v. **18** (2), p. 45-49.

Thorne, A., Grün, R., Mortimer, G., Spooner, N.A., Simpson, J.J., McCulloch, M., Taylor, L., and Curnoe, D., 1999, Australia's oldest human remains: age of the Lake Mungo 3 skeleton: Journal of Human Evolution, v. 36, p. 591-612.

### **Acknowledgments**

Dr Jon Olley and Dr Peter Wallbrink of CSIRO Division of Land and Water, Canberra, are thanked for the high-resolution germanium  $\gamma$ -spectrometry analysis, and Norman Hill, RSES, for some of the sample preparation and OSL measurements.

**Table 1.** OSL ages for each sample, along with the measured palaeodose, calculated dose-rates and estimated water contents.

|    | Field Sample<br>number | Lab code<br>number     | Paleodose<br>(Gy) | Dose rate<br>(Gy/ka) | Percent<br>water | Age<br>(ka) |
|----|------------------------|------------------------|-------------------|----------------------|------------------|-------------|
| 1  | KWB 4                  | ANU <sub>OD</sub> 1063 | 64.7 ± 3.4        | 0.67 ± 0.03          | 15.0 ± 3.0       | 109.9 ± 7.6 |
| 2  | KWB 6                  | ANU <sub>OD</sub> 1064 | 55.0 ± 2.1        | 0.59 ± 0.02          | 12.0 ± 2.4       | 102.7 ± 5.4 |
| 3  | KWB 9                  | ANU <sub>OD</sub> 1065 | 77.0 ± 2.1        | 0.85 ± 0.02          | 9.0 ± 2.3        | 99.7 ± 4.4  |
| 4  | KWB 10                 | ANU <sub>OD</sub> 1066 | 56.9 ± 2.8        | 1.03 ± 0.02          | 15.0 ± 2.3       | 62.8 ± 3.6  |
| 5  | KWB 11                 | ANU <sub>OD</sub> 1067 | 63.6 ± 1.9        | 1.36 ± 0.02          | 12.0 ± 2.4       | 52.0 ± 2.1  |
| 6  | KWB 13                 | ANU <sub>OD</sub> 1068 | 29.8 ± 0.6        | 1.01 ± 0.02          | 9.0 ± 3.9        | 31.5 ± 1.4  |
| 7  | WmPt 6                 | ANU <sub>OD</sub> 1076 | 99.4 ± 2.9        | 1.20 ± 0.03          | 6.0 ± 1.5        | 88.1 ± 3.8  |
| 8  | WmPt 7                 | ANU <sub>OD</sub> 1077 | 78.4 ± 2.7        | 1.28 ± 0.03          | 6.0 ± 1.5        | 63.1 ± 2.8  |
| 9  | WmPt 10                | ANU <sub>OD</sub> 1078 | 98.7 ± 4.6        | 1.22 ± 0.02          | 12.0 ± 2.4       | 88.5 ± 4.9  |
| 10 | WmPt 11                | ANU <sub>OD</sub> 1079 | 69.1 ± 1.8        | 1.37 ± 0.03          | 9.0 ± 2.3        | 50.4 ± 1.8  |
| 11 | WmPt 13                | ANU <sub>OD</sub> 1080 | 55.9 ± 3.0        | 1.18 ± 0.03          | 9.0 ± 2.7        | 50.8 ± 3.3  |
| 12 | Punkra 2               | ANU <sub>OD</sub> 1072 | 52.2 ± 2.4        | 0.73 ± 0.03          | 9.0 ± 1.8        | 78.6 ± 4.9  |
| 13 | Punkra 6               | ANU <sub>OD</sub> 1073 | 91.7 ± 5.9        | 0.96 ± 0.03          | 6.0 ± 1.5        | 100.1 ± 7.2 |
| 14 | Punkra 8               | ANU <sub>OD</sub> 1074 | 174.3 ± 6.4       | 1.32 ± 0.03          | 6.0 ± 1.5        | 137.3 ± 6.5 |
| 15 | Dul 1                  | ANU <sub>OD</sub> 1086 | 25.0 ± 1.1        | 0.74 ± 0.03          | 10.0 ± 2.5       | 36.4 ± 2.3  |
| 16 | TBM 92/1 1             | ANU <sub>OD</sub> 1081 | 55.1 ± 1.5        | 0.75 ± 0.03          | 9.0 ± 2.3        | 77.1 ± 3.8  |
| 17 | TBM 92/1 2             | ANU <sub>OD</sub> 1082 | 46.0 ± 3.9        | 0.61 ± 0.03          | 9.0 ± 2.3        | 78.4 ± 7.6  |
| 18 | WW 2                   | ANU <sub>OD</sub> 1070 | 90.3 ± 3.4        | 1.01 ± 0.02          | 9.0 ± 2.3        | 96.6 ± 4.7  |
| 19 | L Out 1                | ANU <sub>OD</sub> 1075 | 98.5 ± 4.4        | 1.79 ± 0.06          | 12.0 ± 2.4       | 62.3 ± 3.8  |
| 20 | Lake Dom 1             | ANU <sub>OD</sub> 1047 | 140.9 ± 6.2       | 1.382 ± 0.042        | 10.0 ± 2.5       | 110.2 ± 6.3 |
| 21 | Lake Dom 6             | ANU <sub>OD</sub> 1049 | 62.6 ± 1.7        | 1.227 ± 0.038        | 9.0 ± 2.7        | 51.0 ± 2.1  |
| 22 | Lake Dom 9             | ANU <sub>OD</sub> 1051 | 32.3 ± 1.5        | 0.493 ± 0.025        | 8.0 ± 2.4        | 69.2 ± 4.9  |
| 23 | M95 TL 1               | ANU <sub>OD</sub> 1104 | 110.7 ± 4.8       | 0.861 ± 0.033        | 9.0 ± 2.7        | 124.9 ± 7.4 |
| 24 | M95 TL 3               | ANU <sub>OD</sub> 1106 | 106.7 ± 4.7       | 0.931 ± 0.031        | 10.0 ± 3.0       | 119.9 ± 7.2 |
| 25 | M95 TL 5               | ANU <sub>OD</sub> 1107 | 21.6 ± 0.8        | 0.699 ± 0.026        | 9.0 ± 2.7        | 32.4 ± 1.8  |
| 26 | Syd Harb 1             | ANU <sub>OD</sub> 1098 | 84.9 ± 4.6        | 0.798 ± 0.024        | 12.0 ± 3.0       | 118.9 ± 7.9 |
| 27 | Syd Harb 2             | ANU <sub>OD</sub> 1099 | 67.6 ± 2.1        | 0.959 ± 0.033        | 8.0 ± 2.4        | 73.5 ± 3.7  |
| 28 | Camel Sw 1             | ANU <sub>OD</sub> 1403 | 68.6 ± 2.2        | 1.069 ± 0.037        | 9.0 ± 1.4        | 64.2 ± 3.0  |
| 29 | Camel Sw 2             | ANU <sub>OD</sub> 1404 | 73.4 ± 2.0        | 1.146 ± 0.041        | 6.0 ± 1.0        | 64.1 ± 2.9  |
| 30 | L Mary B               | ANU <sub>OD</sub> 1401 | 62.8 ± 3.7        | 0.808 ± 0.03         | 3.9 ± 0.6        | 77.7 ± 5.4  |

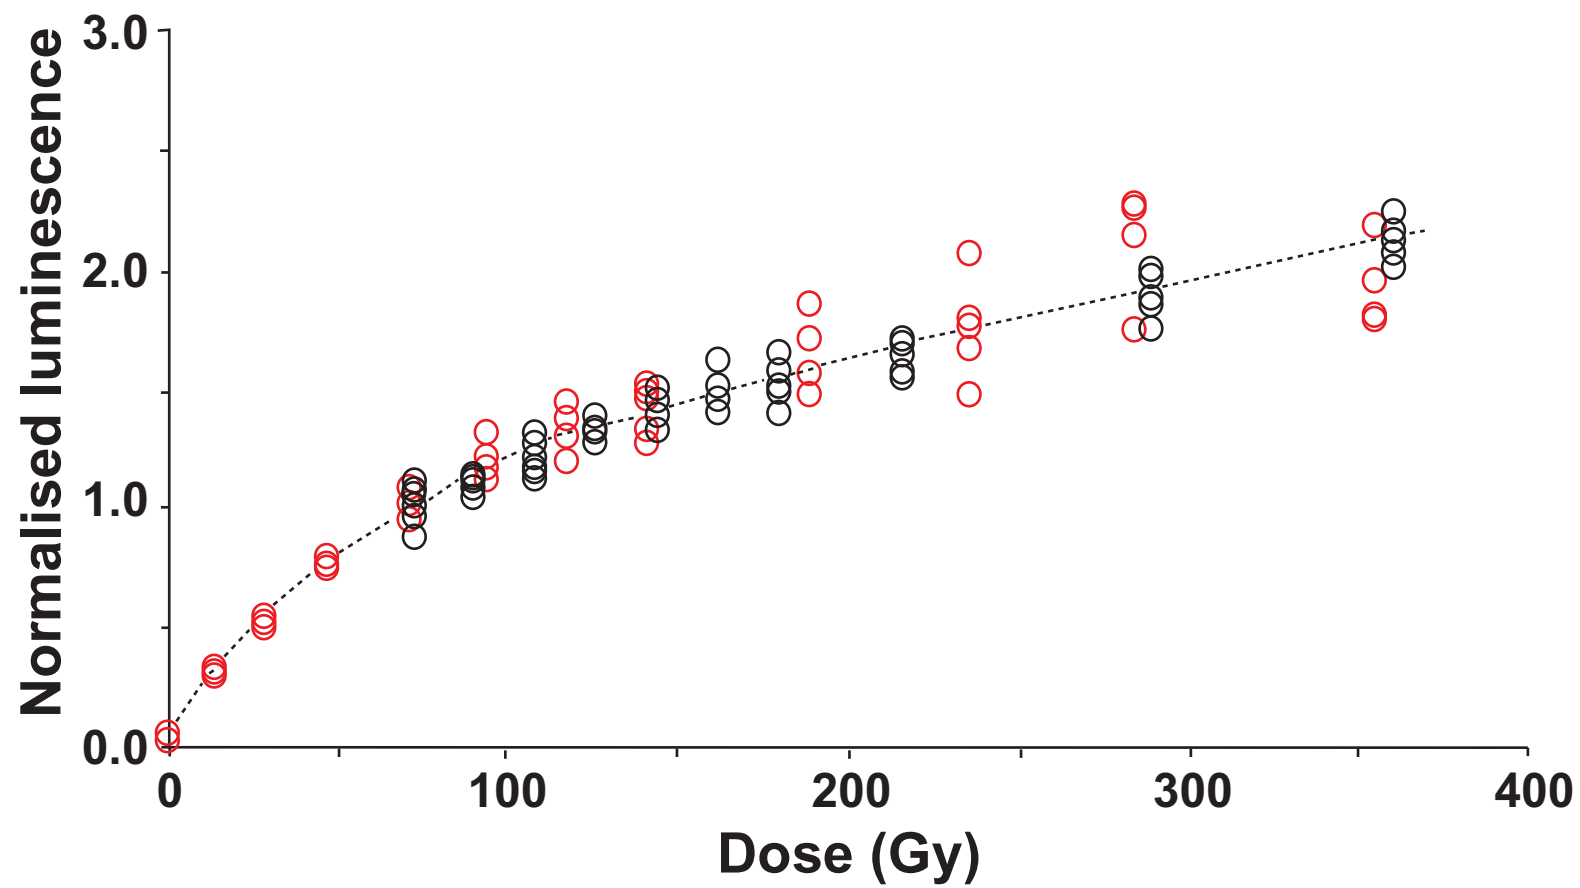

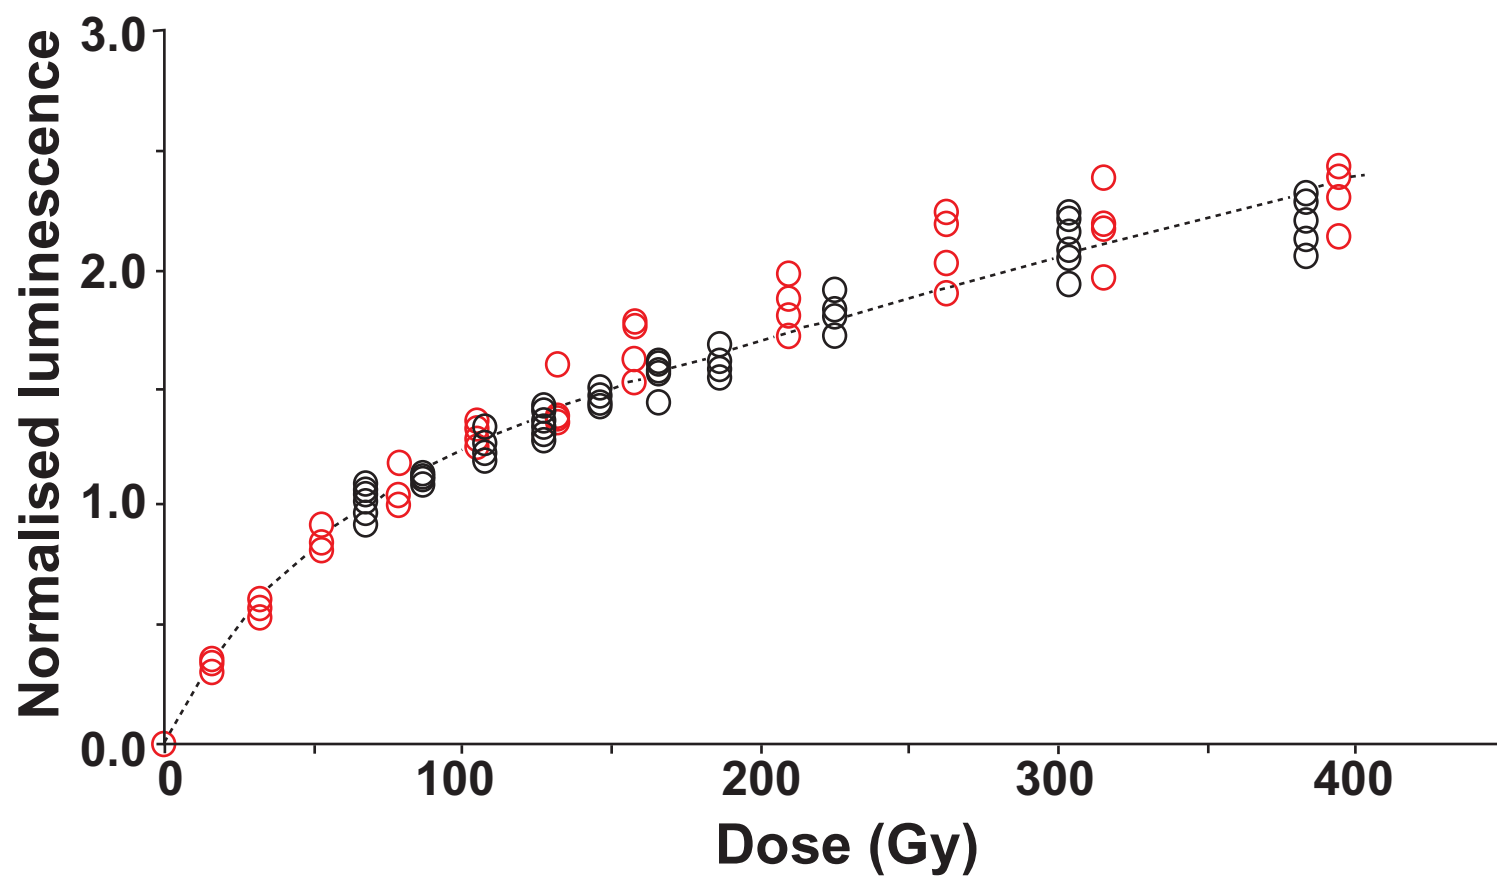

Supplement: Supplementary file 1 [file 22745897]
